# Supplementary material for: A novel and diverse group of Candidatus Patescibacteria from bathypelagic Lake Baikal revealed through long-read metagenomics
Source: PubMed Central journal article supplement (PMC9948471; doi:10.1186/s40793-023-00473-1), 2023-02-23
Supplement: 40793_2023_473_MOESM1_ESM.pdf [file 40793_2023_473_MOESM1_ESM.pdf]

## **A novel and diverse group of Candidatus Patescibacteria from bathypelagic Lake Baikal revealed through long-read metagenomics**

Jose M. Haro-Moreno<sup>a</sup>, Pedro J. Cabello-Yeves<sup>b</sup>, M. Pilar Garcillán-Barcia<sup>c</sup>, Alexandra Zakharenko<sup>d</sup>, Tamara I. Zenskaya<sup>d</sup>, and Francisco Rodriguez-Valera<sup>a,\*</sup>

<sup>a</sup>Evolutionary Genomics Group, Departamento Producción Vegetal y Microbiología, Universidad Miguel Hernández, Apartado 18, San Juan 03550, Alicante, Spain.

<sup>b</sup>Cavanilles Institute of Biodiversity and Evolutionary Biology, University of Valencia, E-46980 Paterna, Valencia, Spain. <sup>c</sup>Instituto de Biomedicina y Biotecnología de Cantabria (IBBTEC), Universidad de Cantabria-Consejo Superior de Investigaciones Científicas, Santander, Spain. <sup>d</sup>Limnological Institute, Siberian Branch of the Russian Academy of Sciences, Irkutsk, Russia.

\*Corresponding author: [frvalera@umh.es](mailto:frvalera@umh.es)

Evolutionary Genomics Group, Departamento Producción Vegetal y Microbiología, Universidad Miguel Hernández, Apartado 18, San Juan de Alicante, 03550 Alicante, Spain.

Phone +34-965919313, Fax +34-965 919457

## **SUPPORTING INFORMATION**

**Figure S1. A)** Principal component analysis (PCA) between deep Lake Baikal metagenomes based on a Bray-Curtis similarity k-mer profile frequencies of sequencing reads. Red and blue dots represent summer and winter Illumina metagenomes, respectively, while the green dot is the sample retrieved in this study and sequenced with PacBio Sequel II. **B)** Phylum-level composition based on 16S rRNA gene fragments (Illumina and PacBio CCS5 reads) of the different metagenomes. The single metagenome highlighted in green corresponds to the PacBio sequencing, whilst the rest of datasets belong to previous Illumina sequencing. The phylum Proteobacteria was divided into its class-level classification. Only those groups with abundance values larger than 1 % in any of the metagenomes are shown. **C)** Classification of the 1600m PacBio CCS5 16S rRNA reads at a higher taxonomic resolution. Only sequences larger than 1,000 nucleotides were considered. Sequences ascribed to the *Ca. Patescibacteria* phylum are highlighted in green.

**Figure S2.** Alignment of two LAGs that are complete in a single contig and the respective MAG from the Illumina assembly.

**Figure S3. A)** Maximum likelihood phylogenetic tree of the Baikalibacteria 16S rRNA genes. Sequences outside the deep branch coming from Figure 1 were used as an outgroup for the tree. The reads from the four read bins are colored in the figure. **B)** Diversity of 16S rRNA sequences of Baikalibacteria bins. Linear representation of selected CCS5 reads (indicated with a red circle in the left panel) containing a 16S

rRNA gene. A pairwise blastn comparison among reads was performed to detect orthologous genes.

**Figure S4. A)** Average nucleotide identity based on metagenomic reads (ANIr) of LAGs and the four Baikalibacteria Bins. **B)** ANIr of ten randomly selected sequences of each Baikalibacteria bin.

**Figure S5.** Metagenomic recruitment of the largest fragment of Baikalibacteria RBin09 on Lake Thun 180 m deep.

**Figure S6.** Maximum likelihood phylogenetic tree of the a) phytoene elongase (LyeJ), b) carotenoid 3,4-desaturase (CrtD), and c) bisanhydrobacterioruberin hydratase (CruF) proteins.

**Table S1.** Summary statistics of the Baikal 1600 m long-read sequencing and metagenomic assembly.

**Table S2.** Genomic parameters of LAGs recovered in this study.

**Table S3.** Genomic parameters of LAGs recovered in this study with ANI > 99.5 % to MAGs retrieved from Lake Baikal 1250 and 1350 m deep.

**Table S4.** Genomic parameters of the resulting bins from the Baikal 1600 m CCS sequences. The four Baikalibacteria bins are highlighted in yellow.



a) PCoA Bray-Curtis similarity

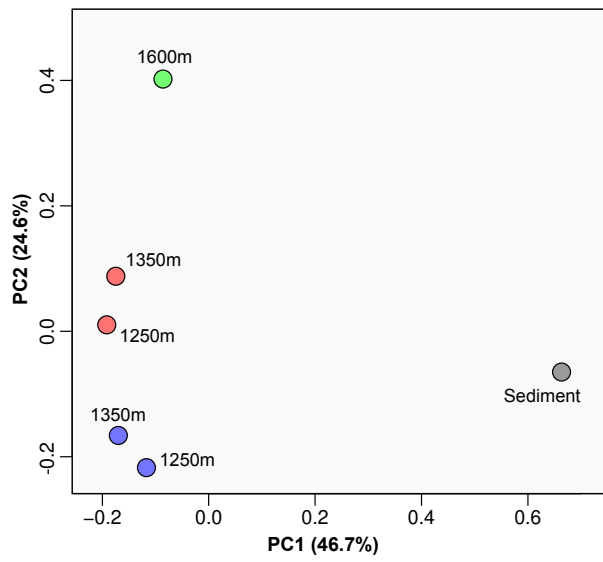

b) 16S rRNA (%)

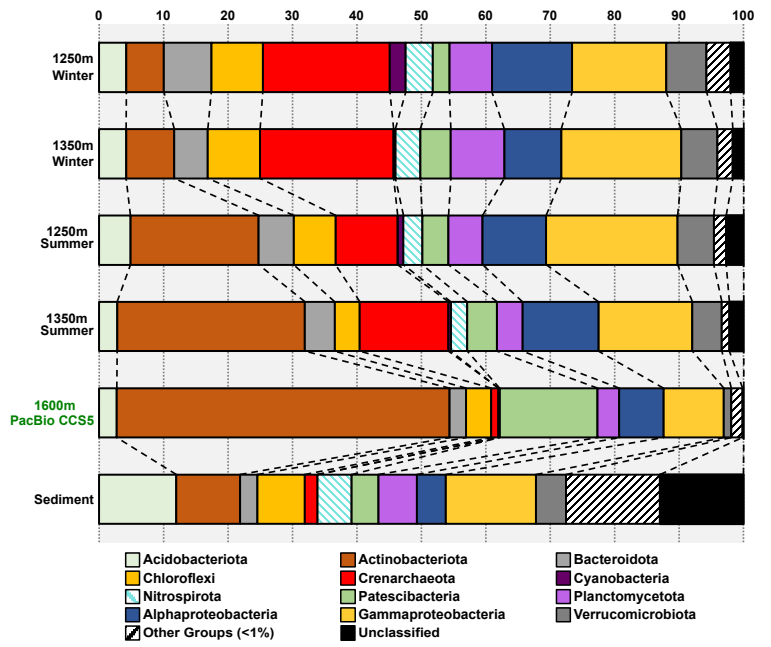

c)

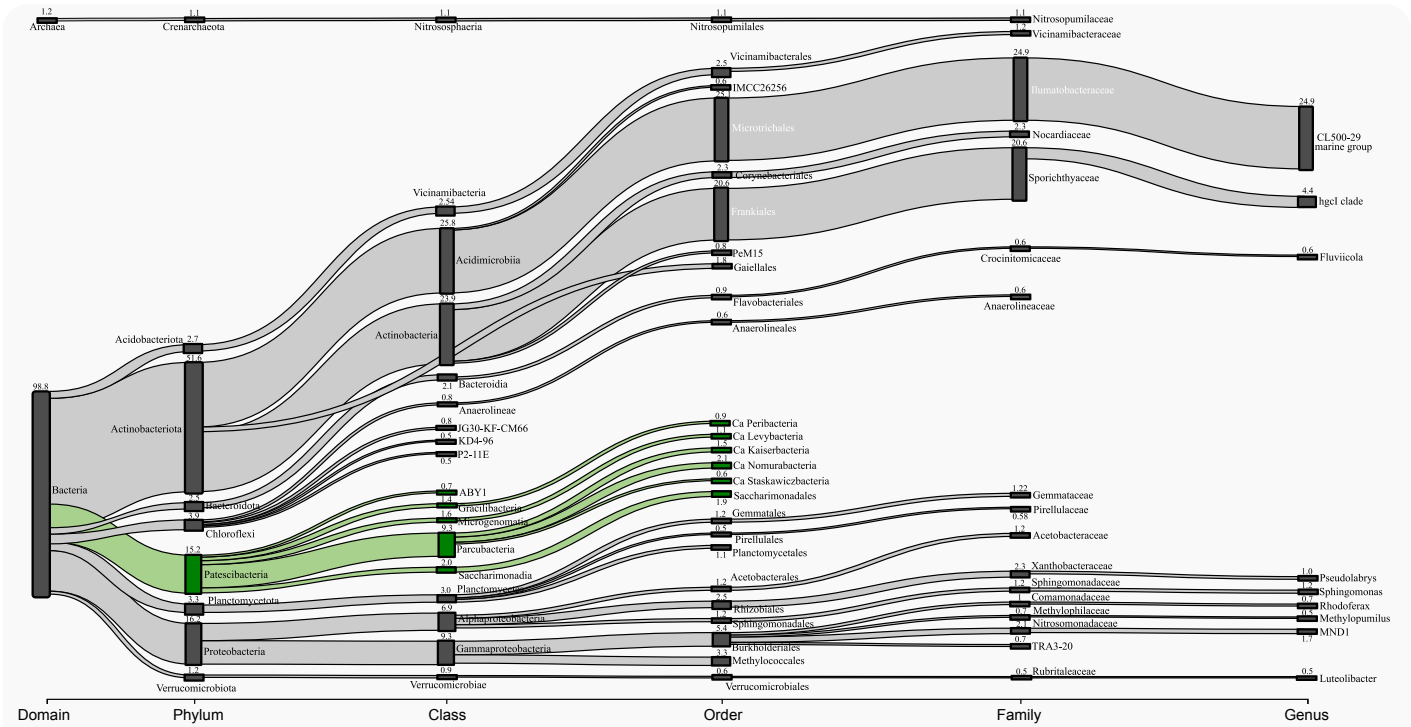

**Levybacteria Baikal-deep-G183**

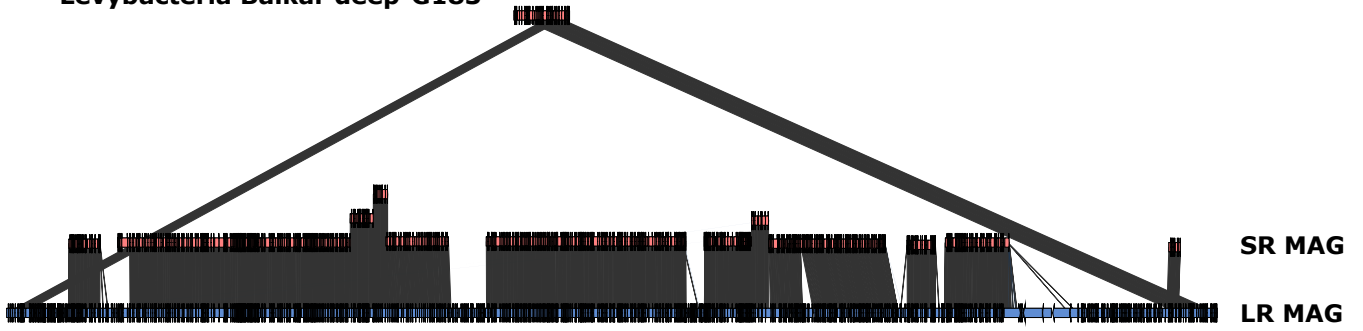

**Patescibacteria Baikal-deep-G193**

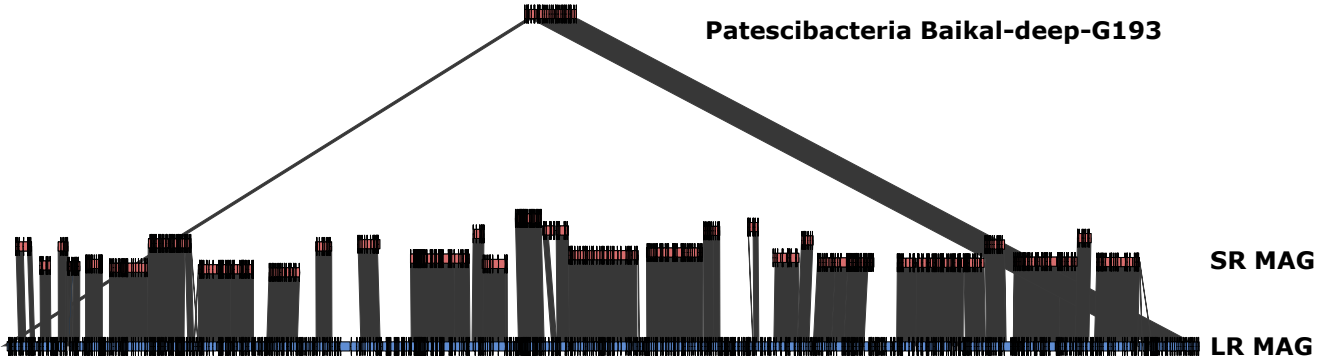

a)

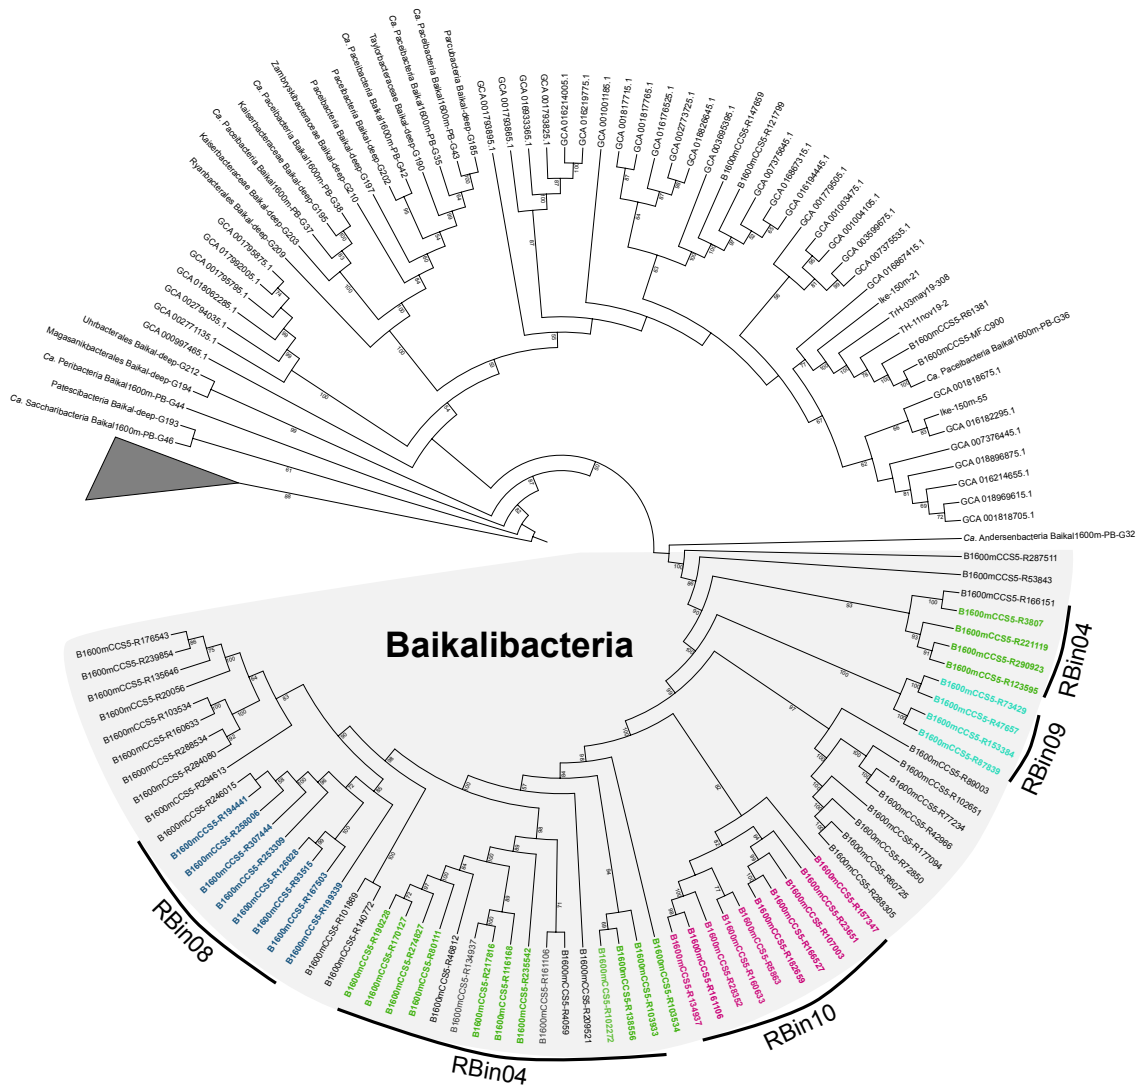

b)

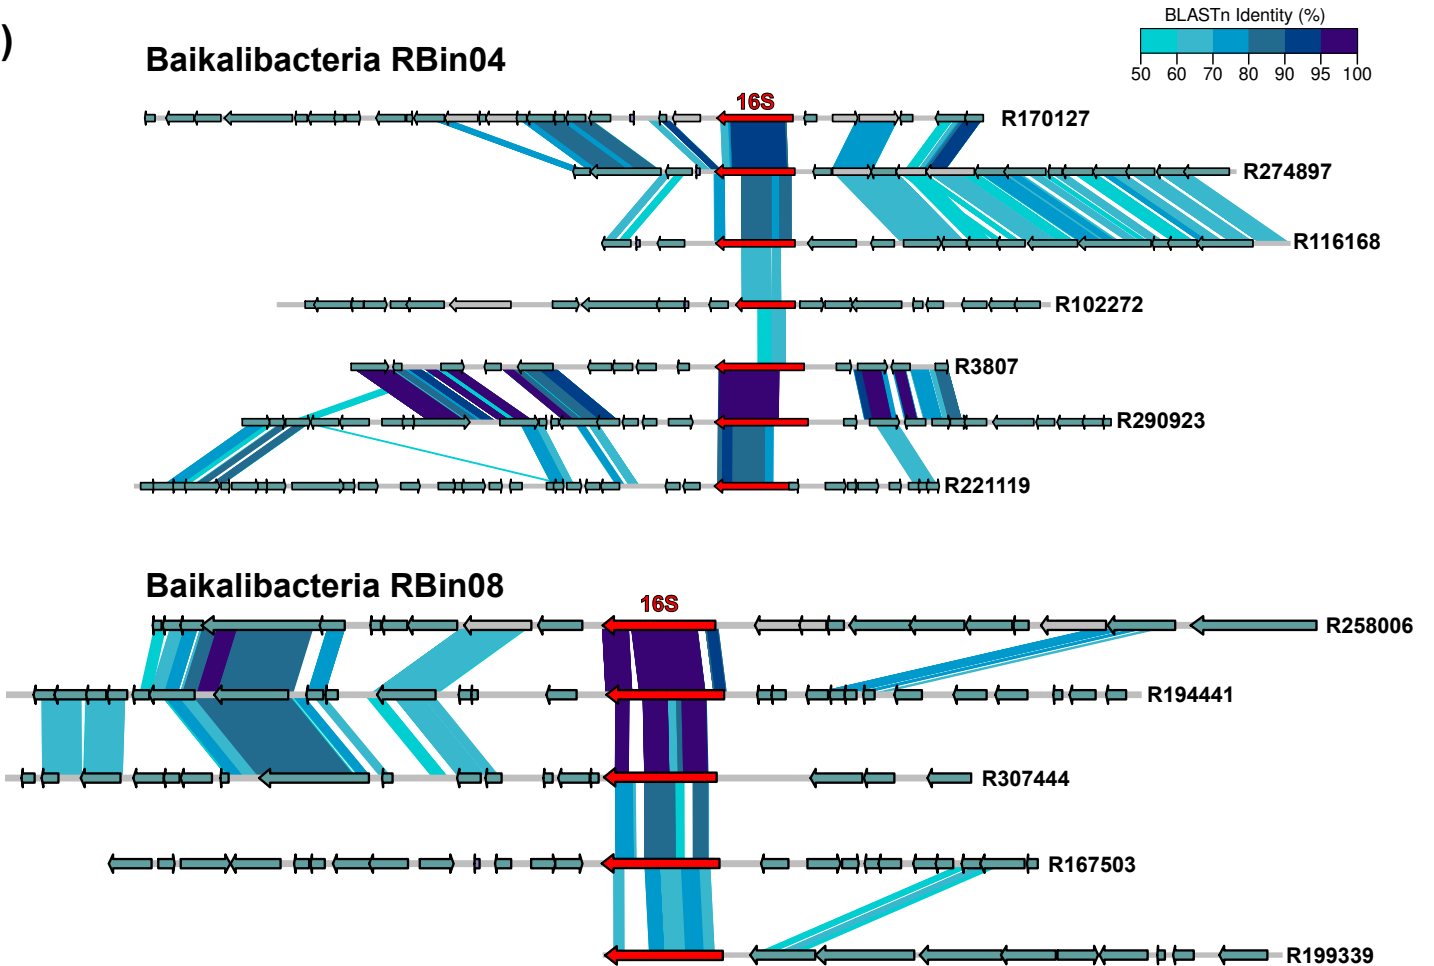

a)

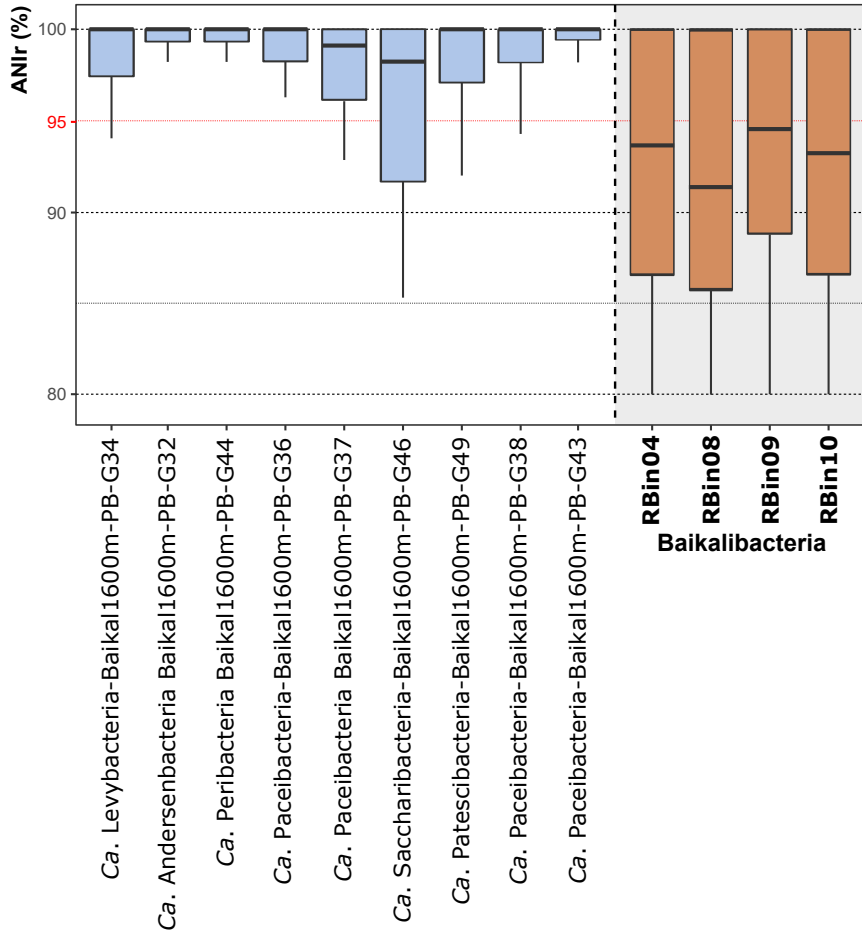

b)

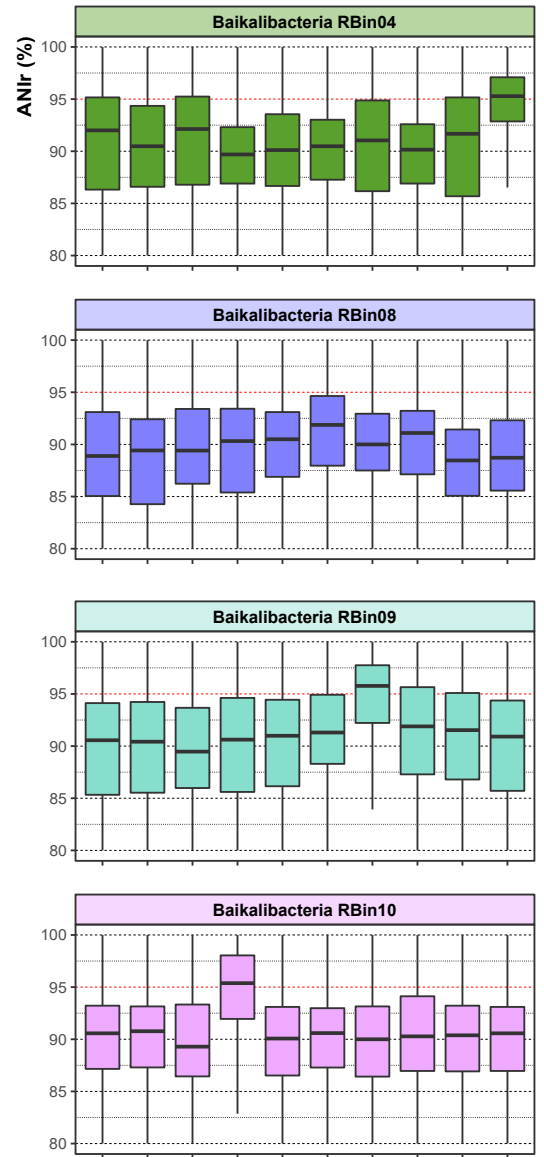



### Baikalibacteria RBin09 on Lake Thun

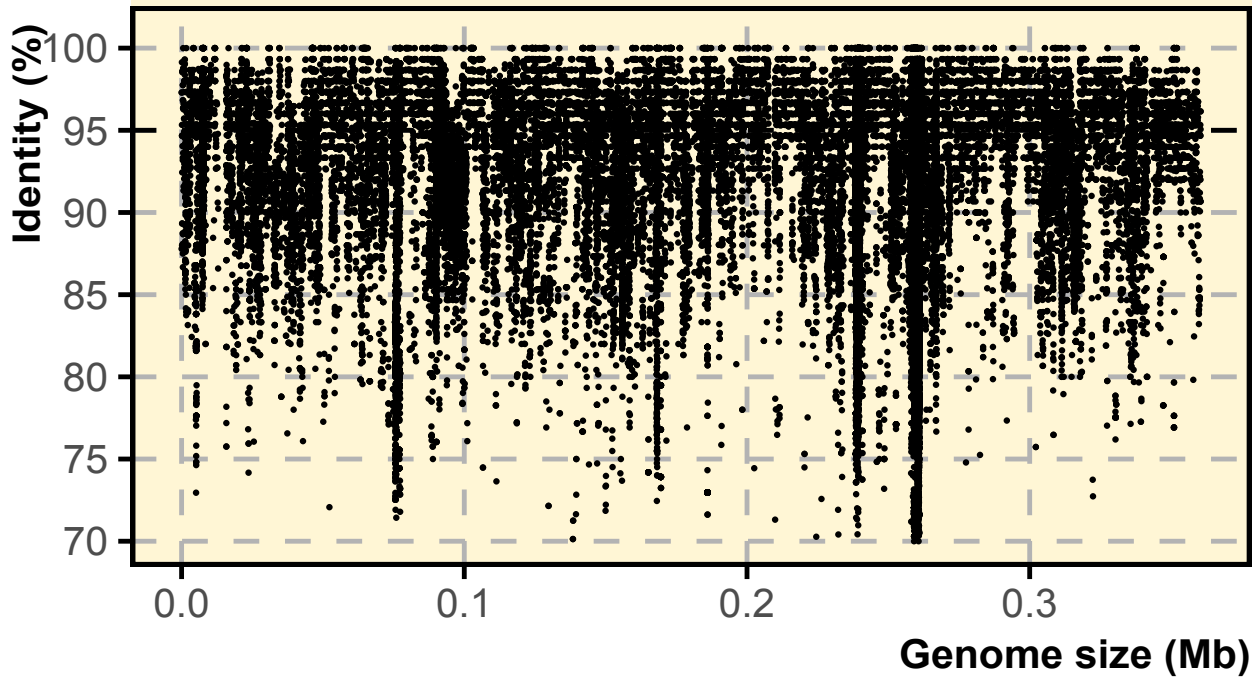

a)

**lycopene elongase (*lyeJ*)**

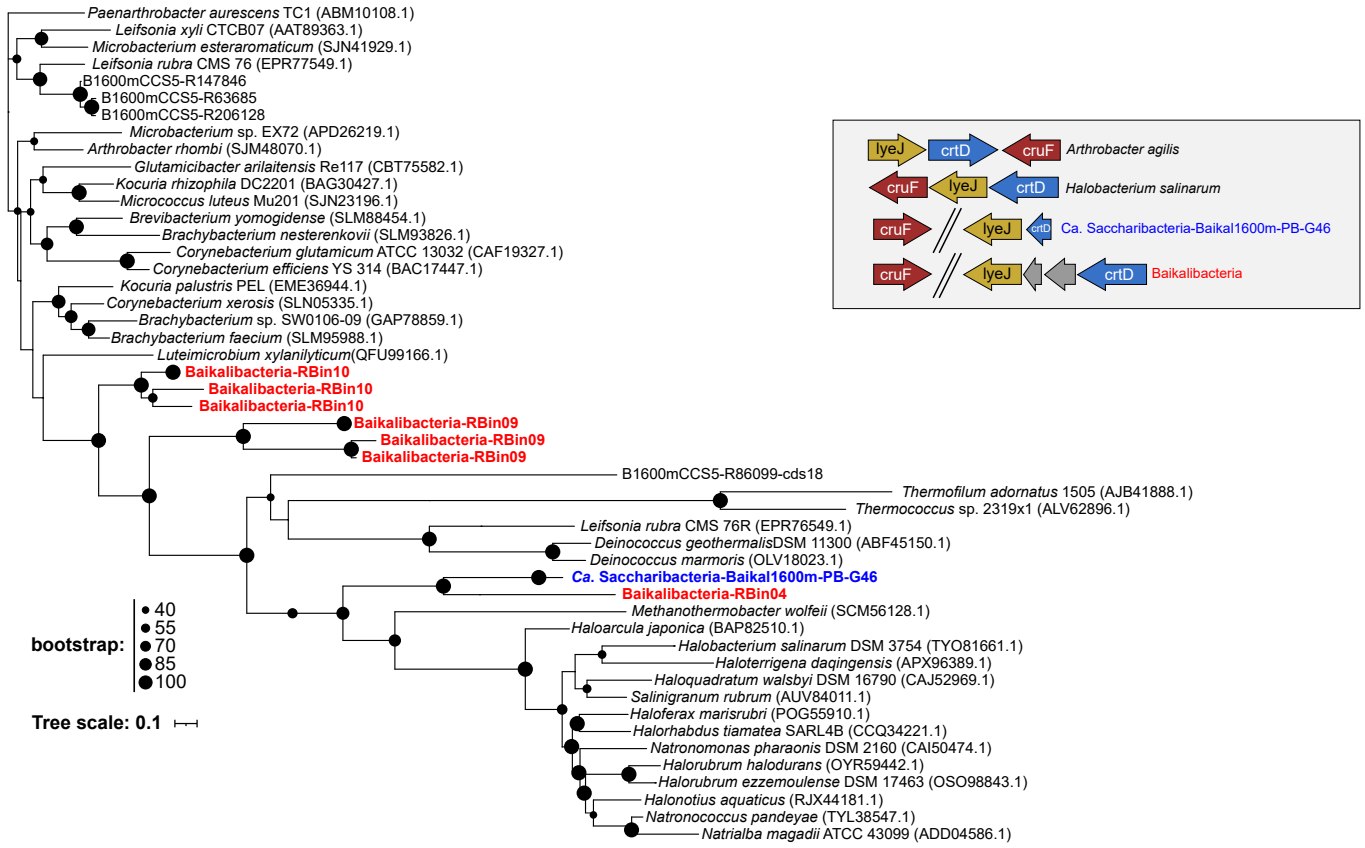

b)

**carotenoid 3,4-desaturase (*crtD*)**

c)

**bisanhydrobacterioruberin hydratase (*cruF*)**

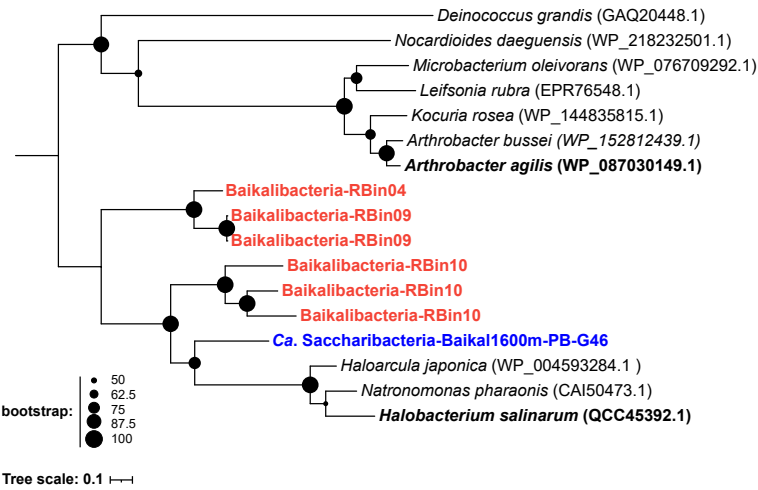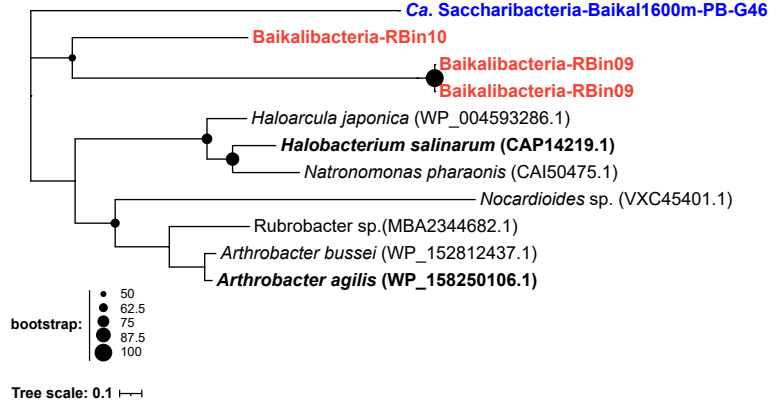

**Table S1.** Summary statistics of the Baikal 1600 m long-read sequencing and metagenomic assembly.

| Read Type (Processing)                          | 1600 m deep PacBio Sequel II |             |
|-------------------------------------------------|------------------------------|-------------|
|                                                 | Raw Reads                    | CCS Reads 5 |
| <b>Sequencing statistics (Reads &gt; 1 Kb):</b> |                              |             |
| #Sequences (Millions)                           | 6.61                         | 0.31        |
| Nucleotides sequenced (Gb)                      | 90.83                        | 4.46        |
| Largest read size (bp)                          | 435,307                      | 29,377      |
| Average length read size (bp)                   | 13,744                       | 14,334      |
| <b>Predicted proteins (Reads &gt; 1 Kb):</b>    |                              |             |
| Proteins (Millions)                             | 96.0                         | 6.6         |
| Average Protein Size (aa)                       | 135.4                        | 183.4       |
| Proteins / Mb Sequenced                         | 1,057.0                      | 1,482.4     |
| <b>Assembly statistics (Contigs &gt; 1 Kb):</b> |                              |             |
| #Sequences                                      | -                            | 2,913       |
| #Nucleotides assembled (Mb)                     | -                            | 192.2       |
| Largest contig size (bp)                        | -                            | 2,256,336   |
| Average length contig size (bp)                 | -                            | 65,968      |

**Table S2.** Genomic parameters of LAGs recovered in this study.

| Group               | Genome Name                             | Match to Lake Baikal Illumina MAG (>99% ANI)        | cMAG | Genome Size (bp) | Number Contigs | Longest Contig Size(bp) | Shortest Contig Size(bp) | GC (%) | Number Proteins | Average Protein Size | Median Intergenic space (bp) | Coding Density (%) | Completeness (%) | Contamination (%) | GTDB Taxonomy                                                                                                           | GTDB Classification Method                           |
|---------------------|-----------------------------------------|-----------------------------------------------------|------|------------------|----------------|-------------------------|--------------------------|--------|-----------------|----------------------|------------------------------|--------------------|------------------|-------------------|-------------------------------------------------------------------------------------------------------------------------|------------------------------------------------------|
| Acidobacteria       | Vicinamibacteriales-Baik1600m-PB-G1     | Acidobacteria Baikal-deep-G12 / Baikal-deep-G4      | --   | 4,886,496        | 43             | 733,256                 | 2,283                    | 65.3   | 4,622           | 43                   | 90                           | 92.35              | 4.84             |                   | d_Bacteriap_Acidobacteriota_c_Vicinamibacterio_o_Vicinamibacteriales_f_UBA2999_g_12-FULL-67-14b_s                       | topology and ANI                                     |
| Actinobacteria      | Acidimicrobia-Baik1600m-PB-G2           | Acidimicrobia Baikal-deep-G23                       | --   | 2,144,435        | 8              | 1,670,992               | 6,563                    | 58.3   | 2,139           | 308.8                | 31                           | 93                 | 77.8             | 1.3               | d_Bacteriap_Actinobacteriota_c_Acidimicrobio_o_IMCC26256f_IMCC26256_g_s                                                 | topology and ANI                                     |
| Actinobacteria      | Acidimicrobia-Baik1600m-PB-G3           | Baik1-G2 / Acidimicrobia Baikal-deep-G22            | --   | 2,083,303        | 11             | 823,156                 | 19,788                   | 53.3   | 2,263           | 281.7                | 25.5                         | 93                 | 96.6             | 2.7               | d_Bacteriap_Actinobacteriota_c_Acidimicrobio_o_IMCC26256f_PALSA-555_g_s                                                 | topology and ANI                                     |
| Actinobacteria      | Ca. Nanopelagicus-Baik1600m-PB-G4       | Ca. Nanopelagicales Baikal-deep-G27                 | --   | 1,215,619        | 6              | 725,322                 | 3,126                    | 42.1   | 1,263           | 300.7                | 15                           | 95                 | 79.8             | 0.0               | d_Bacteriap_Actinobacteriota_c_Actinomycetia_o_Nanopelagiales_f_Nanopelagicaceae_g_Nanopelagicus_s                      | topology and ANI                                     |
| Actinobacteria      | Ca. Planktophila-Baik1600m-PB-G5        | Ca. Planktophila Baikal-deep-G30                    | --   | 1,448,997        | 10             | 388,832                 | 15,501                   | 48.1   | 1,496           | 303.1                | 12                           | 95                 | 81.2             | 0.5               | d_Bacteriap_Actinobacteriota_c_Actinomycetia_o_Nanopelagiales_f_Nanopelagicaceae_g_Planktophila_s                       | topology and ANI                                     |
| Actinobacteria      | Ca. Planktophila-Baik1600m-PB-G6        | Ca. Planktophila Baikal-deep-G30                    | --   | 1,101,041        | 6              | 389,533                 | 47,718                   | 46.1   | 1,519           | 208.2                | 26                           | 87                 | 59.7             | 0.3               | d_Bacteriap_Actinobacteriota_c_Actinomycetia_o_Nanopelagiales_f_Nanopelagicaceae_g_Planktophila_s                       | topology and ANI                                     |
| Actinobacteria      | Ca. Planktophila-Baik1600m-PB-G7        | Ca. Planktophila Baikal-deep-G30                    | --   | 1,302,135        | 7              | 414,753                 | 11,918                   | 47.5   | 1,513           | 257.3                | 20                           | 91                 | 74.7             | 1.1               | d_Bacteriap_Actinobacteriota_c_Actinomycetia_o_Nanopelagiales_f_Nanopelagicaceae_g_Planktophila_s                       | topology and ANI                                     |
| Actinobacteria      | Ilumatobacteraceae-Baik1600m-PB-G8      | Ilumatobacteraceae Baikal-deep-G17                  | --   | 1,440,491        | 15             | 284,918                 | 8,373                    | 52.0   | 1,641           | 274.6                | 16                           | 94                 | 72.2             | 0.9               | d_Bacteriap_Actinobacteriota_c_Acidimicrobio_o_Acidimicrobiales_f_Ilumatobacteraceae_g_UBA3006_s                        | topology and ANI                                     |
| Actinobacteria      | Ilumatobacteraceae-Baik1600m-PB-G9      | Ilumatobacteraceae Baikal-deep-G17                  | --   | 2,010,927        | 17             | 443,986                 | 8,749                    | 47.7   | 2,078           | 302.0                | 20                           | 94                 | 86.4             | 4.7               | d_Bacteriap_Actinobacteriota_c_Acidimicrobio_o_Acidimicrobiales_f_Ilumatobacteraceae_g_BACL27_s                         | topology and ANI                                     |
| Actinobacteria      | Ilumatobacteraceae-Baik1600m-PB-G10     | Ilumatobacteraceae Baikal-deep-G17                  | --   | 2,120,470        | 3              | 1,629,087               | 59,052                   | 51.1   | 2,106           | 319.0                | 17                           | 96                 | 97.9             | 1.3               | d_Bacteriap_Actinobacteriota_c_Acidimicrobio_o_Acidimicrobiales_f_Ilumatobacteraceae_g_UBA2093_s                        | topology and ANI                                     |
| Actinobacteria      | Ilumatobacteraceae-Baik1600m-PB-G11     | Ilumatobacteraceae Baikal-deep-G17                  | --   | 2,183,118        | 7              | 814,896                 | 20,138                   | 51.2   | 2,192           | 311.7                | 18                           | 95                 | 97.9             | 1.3               | d_Bacteriap_Actinobacteriota_c_Acidimicrobio_o_Acidimicrobiales_f_Ilumatobacteraceae_g_UBA2093_s                        | topology and ANI                                     |
| Actinobacteria      | Ca. Nanopelagicales-Baik1600m-PB-G12    | Ca. Nanopelagicales Baikal-deep-G14                 | --   | 2,345,733        | 11             | 855,656                 | 9,998                    | 57.8   | 2,432           | 292.3                | 28                           | 92                 | 94.7             | 0.5               | d_Bacteriap_Actinobacteriota_c_Actinomycetia_o_Nanopelagiales_f_s36-812_g_GCA-2737125_s                                 | topology and ANI                                     |
| Actinobacteria      | Nanopelagicales-Baik1600m-PB-G13        | Nanopelagicales Baikal-deep-G13                     | --   | 1,654,748        | 7              | 990,038                 | 9,697                    | 46.4   | 7,743           | 290.7                | 21                           | 93                 | 84.2             | 0.0               | d_Bacteriap_Actinobacteriota_c_Actinomycetia_o_Nanopelagiales_f_Nanopelagicaceae_g_QY070_s                              | topology and ANI                                     |
| Actinobacteria      | Nanopelagicales-Baik1600m-PB-G14        | Nanopelagicales Baikal-deep-G13                     | --   | 1,131,846        | 12             | 238,295                 | 23,381                   | 44.1   | 1,261           | 276.3                | 17                           | 93                 | 66.5             | 4.7               | d_Bacteriap_Actinobacteriota_c_Actinomycetia_o_Nanopelagiales_f_Nanopelagicaceae_g_UBA398_s                             | topology and ANI                                     |
| Actinobacteria      | Thermoleophila-Baik1600m-PB-G15         | Thermoleophila Baikal-deep-G28                      | --   | 1,630,020        | 3              | 804,662                 | 119,520                  | 68.1   | 1,716           | 270.9                | 39                           | 86                 | 89.9             | 0.9               | d_Bacteriap_Actinobacteriota_c_Thermoleophila_o_Ga0077560_f_Ga0077560_g_SYF01_s                                         | topology and ANI                                     |
| Actinobacteria      | Thermoleophila-Baik1600m-PB-G16         | Thermoleophila Baikal-deep-G21                      | Yes  | 2,256,336        | 1              | --                      | --                       | 63.5   | 2,266           | 309.1                | 22                           | 94                 | 98.4             | 0.4               | d_Bacteriap_Actinobacteriota_c_Thermoleophila_o_Ga0077560_f_Ga0077560_g_SYF01_s                                         | topology and ANI                                     |
| Actinobacteria      | Williamsia-Baik1600m-PB-G17             | Williamsia Baikal-deep-G17                          | Yes  | 6,364,262        | 19             | 1,994,645               | 24,875                   | 64.7   | 6,233           | 301.8                | 55                           | 89                 | 98.2             | 1.3               | d_Bacteriap_Actinobacteriota_c_Actinomycetia_o_Mycobacteriales_f_Mycobacteriales_g_Williamsia_murals                    | topology and ANI                                     |
| Alphaproteobacteria | Acetobacteraceae-Baik1600m-PB-G18       | Acetobacteraceae Baikal-deep-G58                    | --   | 2,750,257        | 31             | 247,627                 | 16,830                   | 60.6   | 3,207           | 230.1                | 71                           | 81                 | 67.0             | 0.83              | d_Bacteriap_Proteobacteria_c_Alphaproteobacteria_o_Acetobacteriales_f_Acetobacteraceae_g_s                              | topology                                             |
| Alphaproteobacteria | Acetobacteraceae-Baik1600m-PB-G19       | Acetobacteraceae Baikal-deep-G58                    | --   | 8,427,791        | 9              | 4,497,302               | 52,026                   | 61.6   | 3,310           | 295.7                | 61                           | 86                 | 98.51            | 1.99              | d_Bacteriap_Proteobacteria_c_Alphaproteobacteria_o_Acetobacteriales_f_Acetobacteraceae_g_s                              | topology                                             |
| Alphaproteobacteria | Ca. Fonsibacter-Baik1600m-PB-G20        | Ca. Fonsibacter Baikal-deep-G36                     | --   | 946,322          | 4              | 627,042                 | 54,036                   | 29.1   | 1,069           | 277.9                | 4                            | 95                 | 75.47            | 0.0               | d_Bacteriap_Proteobacteria_c_Alphaproteobacteria_o_Pelagibacterales_f_Pelagibacteraceae_g_Fonsibacter_s                 | topology and ANI                                     |
| Alphaproteobacteria | Pseudolabrys-Baik1600m-PB-G21           | Pseudolabrys Baikal-deep-G38 / Baikal-deep-G61      | --   | 2,738,833        | 15             | 461,811                 | 9,688                    | 62.1   | 2,796           | 287.5                | 59                           | 89                 | 86.33            | 0.79              | d_Bacteriap_Proteobacteria_c_Alphaproteobacteria_o_Rhizobiales_f_Xanthobacteraceae_g_Pseudolabrys_s                     | topology and ANI                                     |
| Alphaproteobacteria | Reyranelles-Baik1600m-PB-G22            | Reyranelles Baikal-deep-G38 / Baikal-deep-G61       | --   | 5,073,546        | 16             | 1,529,917               | 90,289                   | 65.7   | 5,472           | 275.6                | 32                           | 90                 | 84.93            | 4.96              | d_Bacteriap_Proteobacteria_c_Alphaproteobacteria_o_Reyranelles_f_Reyranelles_g_Reyranelles_s                            | topology and ANI                                     |
| Alphaproteobacteria | Xanthobacteraceae-Baik1600m-PB-G23      | Xanthobacteraceae Baikal-deep-G38 / Baikal-deep-G61 | --   | 4,847,097        | 30             | 780,725                 | 20,618                   | 64.8   | 4,935           | 284.4                | 68                           | 87                 | 95.28            | 2.69              | d_Bacteriap_Proteobacteria_c_Alphaproteobacteria_o_Rhizobiales_f_Xanthobacteraceae_g_22-V6C8680_s                       | topology and ANI                                     |
| Bacteroidetes       | Bacteroidetes-Baik1600m-PB-G24          | Bacteroidetes Baikal-deep-G73                       | --   | 1,675,431        | 10             | 367,283                 | 40,083                   | 31.5   | 1,619           | 325.1                | 11                           | 95                 | 87.7             | 0                 | d_Bacteriap_Bacteroidota_c_Bacteroidia_o_Bacteroidia_f_Bacteroidiales_g_UBA10030_f_UBA10030_s_SX501_s_SX501_sp005_92285 | topology and ANI                                     |
| Bacteroidetes       | Crocinitomacaeae-Baik1600m-PB-G25       | Crocinitomacaeae Baikal-deep-G73                    | --   | 1,234,646        | 14             | 363,284                 | 40,314                   | 34.0   | 1,316.0         | 280.9                | 34                           | 90                 | 51.77            | 1.62              | d_Bacteriap_Bacteroidota_c_Bacteroidia_o_Flavobacteriales_f_Crocinitomacaeae_g_UBA052_s                                 | topology and ANI                                     |
| Bacteroidetes       | Chitinophagaceae-Baik1600m-PB-G26       | Chitinophagaceae Baikal-deep-G26                    | --   | 1,885,910        | 2              | 1,086,709               | 799,201                  | 35.0   | 1,790           | 324.6                | 44                           | 93                 | 95.44            | 0.49              | d_Bacteriap_Bacteroidota_c_Bacteroidia_o_Chitinophagales_f_Chitinophagaceae_g_VBA501_s_VBA501_sp004322425               | topology and ANI                                     |
| Chloroflexi         | Anaerolineales-Baik1600m-PB-G27         | Anaerolineales Baikal-deep-G27                      | --   | 1,315,299        | 11             | 486,992                 | 40,178                   | 62.2   | 1,283           | 303.7                | 65                           | 89                 | 50.3             | 1.82              | d_Bacteriap_Chloroflexi_c_Anaerolineae_o_Anaerolineales_f_UBA11657_g_BD1_s                                              | taxonomic novelty determined using RED               |
| Betaproteobacteria  | Burkholderiales-Baik1600m-PB-G28        | Burkholderiales Baikal-deep-G28                     | --   | 3,381,930        | 41             | 247,617                 | 10,406                   | 59.6   | 3,695           | 254.6                | 80                           | 84                 | 50.3             | 0.83              | d_Bacteriap_Proteobacteria_c_Gammaproteobacteria_o_Burkholderiales_f_SG8-41.g_s                                         | taxonomic novelty determined using RED               |
| Betaproteobacteria  | Burkholderiales-Baik1600m-PB-G29        | Betaproteobacteria Baikal-deep-G89                  | --   | 2,746,740        | 11             | 863,158                 | 15,339                   | 63.0   | 2,865           | 293.1                | 24                           | 92                 | 96.76            | 2.78              | d_Bacteriap_Proteobacteria_c_Gammaproteobacteria_o_Burkholderiales_f_SG8-39.g_RBG-16-66-20_s                            | topology and ANI                                     |
| Gammaproteobacteria | Methylobolus-Baik1600m-PB-G30           | Methylobolus Baikal-deep-G142                       | --   | 2,053,671        | 12             | 506,236                 | 36,921                   | 45.7   | 2,056           | 278.2                | 87                           | 85                 | 95.26            | 1.27              | d_Bacteriap_Proteobacteria_c_Gammaproteobacteria_o_Methylobolales_f_Methylobolales_g_Methylobolus_s                     | topology and ANI                                     |
| Betaproteobacteria  | Methylophilus-Baik1600m-PB-G31          | Methylophilus planktonicus Baikal-deep-G83          | --   | 1,302,697        | 3              | 641,110                 | 298,451                  | 35.8   | 1,403           | 289.1                | 15                           | 94                 | 95.6             | 0                 | d_Bacteriap_Proteobacteria_c_Gammaproteobacteria_o_Burkholderiales_f_Methylobolales_g_Methylophilus_s                   | topology and ANI                                     |
| Patescibacteria     | Ca. Andersenbacteria-Baik1600m-PB-G32   | Patescibacteria Baikal-deep-G197                    | Yes  | 962,557          | 1              | 962,557                 | 962,557                  | 43.7   | 1,047           | 277.7                | 20                           | 92                 | 100.0*           | 0.0*              | d_Bacteriap_Patescibacteria_c_Andersenbacteria_o_UBA10190_f_UBA10190_g_HO2-45-11b_s                                     | taxonomic classification defined by topology and ANI |
| Patescibacteria     | Ca. Gracilbacteria-Baik1600m-PB-G33     | Patescibacteria Baikal-deep-G197                    | --   | 919,098          | 17             | 231,563                 | 6,913                    | 44.3   | 1,000           | 263.7                | 49                           | 87                 | 67.4*            | 4.98*             | d_Bacteriap_Patescibacteria_c_Gracilbacteria_o_UBA1369_f_UBA1369_g_PALSA-1335_s                                         | taxonomic classification defined by topology and ANI |
| Patescibacteria     | Ca. Levybacteria-Baik1600m-PB-G34       | Levybacteria Baikal-deep-G183                       | Yes  | 907,563          | 1              | 907,563                 | 907,563                  | 32.0   | 846             | 323.8                | 39                           | 92                 | 97.7*            | 0.0*              | d_Bacteriap_Patescibacteria_c_Microgenomata_o_Levybacteriales_f_UBA12049.g_s                                            | taxonomic classification fully defined by topology   |
| Patescibacteria     | Ca. Patebacteria-Baik1600m-PB-G35       | Parcubacteria Baikal-deep-G184                      | --   | 1,059,132        | 6              | 755,885                 | 3,509                    | 40.7   | 1,097           | 270.1                | 75                           | 85                 | 93.0*            | 0.0*              | d_Bacteriap_Patescibacteria_c_Patebacteria_o_UBA9983_f_UBA11359_A.g_s                                                   | taxonomic classification defined by topology and ANI |
| Patescibacteria     | Ca. Patebacteria-Baik1600m-PB-G36       | Patebacteria Baikal-deep-G200                       | Yes  | 582,052          | 1              | 582,052                 | 582,052                  | 49.5   | 651             | 260.8                | 45                           | 89                 | 97.7*            | 0.0*              | d_Bacteriap_Patescibacteria_c_Patebacteria_o_UBA6257_f_UBA11618.g_s                                                     | taxonomic classification defined by topology and ANI |
| Patescibacteria     | Ca. Patebacteria-Baik1600m-PB-G37       | Patebacteria Baikal-deep-G200                       | Yes  | 583,336          | 1              | 583,336                 | 583,336                  | 49.3   | 635             | 270.3                | 27                           | 90                 | 97.7*            | 0.0*              | d_Bacteriap_Patescibacteria_c_Patebacteria_o_UBA9983_f_UBA2163.g_C7867-001_s                                            | taxonomic classification defined by topology and ANI |
| Patescibacteria     | Ca. Patebacteria-Baik1600m-PB-G38       | Kaiserbacteraceae Baikal-deep-G195                  | Yes  | 803,329          | 1              | 803,329                 | 803,329                  | 53.5   | 882             | 265.1                | 42                           | 89                 | 97.7*            | 0.0*              | d_Bacteriap_Patescibacteria_c_Patebacteria_o_UBA9983_f_UBA2163.g_UBA10103_s                                             | taxonomic classification defined by topology and ANI |
| Patescibacteria     | Ca. Patebacteria-Baik1600m-PB-G39       | Patebacteria Baikal-deep-G185                       | --   | 464,636          | 5              | 205,777                 | 54,579                   | 35.5   | 563             | 233.3                | 47                           | 87                 | 62.8*            | 0.0*              | d_Bacteriap_Patescibacteria_c_Patebacteria_o_UBA9983_f_UBA9973.g_UBA9973_s                                              | taxonomic classification defined by topology and ANI |
| Patescibacteria     | Ca. Patebacteria-Baik1600m-PB-G40       | Parcubacteria Baikal-deep-G185                      | --   | 592,655          | 5              | 117,467                 | 16,160                   | 38.3   | 617             | 254.6                | 103                          | 81                 | 74.4*            | 0.0*              | d_Bacteriap_Patescibacteria_c_Patebacteria_o_UBA9983_f_Zambyksbacteraceae_g_C7867-006_s                                 | taxonomic classification defined by topology and ANI |
| Patescibacteria     | Ca. Patebacteria-Baik1600m-PB-G41       | Patebacteria Baikal-deep-G200                       | --   | 634,378          | 4              | 380,661                 | 64,066                   | 37.7   | 768             | 225.8                | 65                           | 83                 | 100.0*           | 0.0*              | d_Bacteriap_Patescibacteria_c_Patebacteria_o_UBA9983_f_UBA5272.g_UBA11704_s                                             | taxonomic classification defined by topology and ANI |
| Patescibacteria     | Ca. Patebacteria-Baik1600m-PB-G42       | Patebacteria Baikal-deep-G202                       | --   | 558,371          | 2              | 485,322                 | 73,049                   | 39.4   | 639             | 249.3                | 46                           | 87                 | 86.1*            | 0.0*              | d_Bacteriap_Patescibacteria_c_Patebacteria_o_UBA9983_f_Zambyksbacteraceae_g_s                                           | taxonomic classification fully defined by topology   |
| Patescibacteria     | Ca. Patebacteria-Baik1600m-PB-G43       | aylorbacteraceae Baikal-deep-G189                   | Yes  | 754,737          | 1              | 754,737                 | 754,737                  | 39.2   | 744             | 308.2                | 27                           | 92                 | 97.7*            | 2.3*              | d_Bacteriap_Patescibacteria_c_Patebacteria_o_UBA9983_f_UBA11359.g_SX1015_s                                              | taxonomic classification defined by topology and ANI |
| Patescibacteria     | Ca. Peribacteria-Baik1600m-PB-G44       | Peribacteria Baikal-deep-G192                       | Yes  | 1,119,680        | 1              | 1,119,680               | 1,119,680                | 51.7   | 1,045           | 325.1                | 43                           | 92                 | 100.0*           | 0.0*              | d_Bacteriap_Patescibacteria_c_Gracilbacteria_o_Peribacteriales_f_Peribacteraceae_g_2-02-FULL-51-10_s                    | taxonomic classification defined by topology and ANI |
| Patescibacteria     | Ca. Saccharibacteria-Baik1600m-PB-G45   | Saccharibacteria Baikal-deep-G192                   | --   | 571,293          | 7              | 142,366                 | 40,134                   | 40.6   | 670             | 243.6                | 45                           | 87                 | 86.1*            | 0.0*              | d_Bacteriap_Patescibacteria_c_Saccharimonadia_o_Saccharimonadales_f_AWTP1-31.g_s                                        | taxonomic classification defined by topology and ANI |
| Patescibacteria     | Ca. Saccharibacteria-Baik1600m-PB-G46   | Saccharibacteria Baikal-deep-G192                   | Yes  | 724,546          | 1              | 724,546                 | 724,546                  | 46.2   | 733             | 282.9                | 48                           | 87                 | 100.0*           | 0.0*              | d_Bacteriap_Patescibacteria_c_Saccharimonadia_o_f_g_s                                                                   | taxonomic novelty determined using RED               |
| Patescibacteria     | Ca. Saccharibacteria-Baik1600m-PB-G47   | Saccharibacteria Baikal-deep-G192                   | --   | 699,520          | 8              | 116,516                 | 35,645                   | 45.3   | 887             | 225.0                | 47                           | 87                 | 67.4*            | 0.0*              | d_Bacteriap_Patescibacteria_c_Saccharimonadia_o_Saccharimonadales_f_Saccharimonadales_g_2011-GWC2-44-17_s               | ANI                                                  |
| Patescibacteria     | Ca. Staskawiczbacteria-Baik1600m-PB-G48 | Staskawiczbacteria Baikal-deep-G187                 | --   | 522,042          | 2              | 500,723                 | 21,319                   | 38.3   | 599             | 248.0                | 37                           | 87                 | 90.7*            | 0.0*              | d_Bacteriap_Patescibacteria_c_Patebacteria_o_Staskawiczbacteraceae_g_01-FULL-38-12b_s                                   | taxonomic classification defined by topology and ANI |
| Patescibacteria     | Patescibacteria-Baik1600m-PB-G49        | Patescibacteria Baikal-deep-G193                    | Yes  | 737,753          | 1              | 737,753                 | 737,753                  | 52.7   | 833             | 262.5                | 41                           | 90                 | 97.7*            | 0.0*              | d_Bacteriap_Patescibacteria_c_Patebacteria_o_f_g_s                                                                      | taxonomic novelty determined using RED               |
| Planctomycetes      | Gemmatataceae-Baik1600m-PB-G50          | Gemmatataceae Baikal-deep-G161                      | --   | 4,600,205        | 10             | 1,108,979               | 41,480                   | 55.8   | 4,068           | 337.6                | 61                           | 90                 | 97.24            | 1.14              | d_Bacteriap_Planctomycetota_c_Planctomycetes_o_Gemmatatales_f_Gemmatataceae_g_s                                         | taxonomic novelty determined using RED               |
| Planctomycetes      | Gemmatataceae-Baik1600m-PB-G51          | Gemmatataceae Baikal-deep-G173                      | --   | 4,632,407        | 21             | 804,744                 | 45,209                   | 52.8   | 3,988           | 336.7                | 72                           | 88                 | 93.18            | 1.14              | d_Bacteriap_Planctomycetota_c_Planctomycetes_o_Gemmatatales_f_Gemmatataceae_g_SYL601_s                                  | topology and ANI                                     |
| Planctomycetes      | Planctomycetales-Baik1600m-PB-G52       | Planctomycetales Baikal-deep-G173                   | --   | 6,369,109        | 75             | 432,859                 | 3,160                    | 59.6   | 5,345           | 348.8                | 92                           | 89                 | 77.96            | 2.25              | d                                                                                                                       |                                                      |

**Table S3.** Genomic parameters of LAGs recovered in this study with ANI > 99.5% to MAGs retrieved from Lake Baikal 1250 and 1350 m deep.

| Taxonomy                                     | MAG                                               | Genome Size (bp) | Number of Contigs | Longest Contig Size (bp) | CheckM Completeness (%) | Checkm Contamination (%) |
|----------------------------------------------|---------------------------------------------------|------------------|-------------------|--------------------------|-------------------------|--------------------------|
| Acidobacteria                                | Vicinamibacterales-Baikal1600m-PB-G1              | 4,886,496        | 43                | 733,256                  | 92.4                    | 4.8                      |
|                                              | Acidobacteria Baikal-deep-G12                     | 3,248,293        | 182               | 109,448                  | 79.2                    | 4.3                      |
| Actinobacteria                               | Ca. Planktophila-Baikal1600m-PB-G5                | 1,448,997        | 10                | 388,832                  | 81.2                    | 0.5                      |
|                                              | Ca. Planktophila Baikal-deep-G30                  | 1,083,458        | 58                | 84,945                   | 72.9                    | 0.5                      |
|                                              | Thermoleophilia-Baikal1600m-PB-G15                | 1,630,020        | 3                 | 840,662                  | 89.9                    | 0.9                      |
|                                              | Thermoleophilia Baikal-deep-G28                   | 1,496,510        | 19                | 226,797                  | 85.8                    | 0.0                      |
|                                              | Thermoleophilia-Baikal1600m-PB-G16                | 2,256,336        | 1                 | 2,256,336                | 98.4                    | 0.4                      |
|                                              | Thermoleophilia Baikal-deep-G21                   | 1,496,510        | 19                | 226,797                  | 83.3                    | 0.7                      |
|                                              | Ilumatobacteraceae-Baikal1600m-PB-G11             | 2,345,733        | 11                | 855,656                  | 94.7                    | 0.5                      |
|                                              | Ca. Nanopelagiales Baikal-deep-G14                | 1,686,946        | 104               | 75,118                   | 86.1                    | 0.8                      |
|                                              | Acidimicrobiia-Baikal1600m-PB-G2                  | 2,144,435        | 8                 | 1,670,992                | 77.8                    | 1.3                      |
|                                              | Acidimicrobia Baikal-deep-G23                     | 2,252,929        | 180               | 52,426                   | 85.3                    | 1.3                      |
|                                              | Ilumatobacteraceae-Baikal1600m-PB-G10             | 2,120,470        | 3                 | 1,629,087                | 97.9                    | 1.3                      |
|                                              | Ilumatobacteraceae Baikal-deep-G17                | 1,762,442        | 73                | 82,555                   | 85.9                    | 6.2                      |
|                                              | Ca. Nanopelagicus-Baikal1600m-PB-G4               | 1,215,619        | 6                 | 725,322                  | 79.8                    | 0.0                      |
|                                              | Ca. Nanopelagiales Baikal-deep-G27                | 1,081,859        | 71                | 49,511                   | 70.6                    | 0.1                      |
| Acidimicrobiia-Baikal1600m-PB-G3             | 2,083,303                                         | 11               | 823,156           | 96.6                     | 2.7                     |                          |
| Acidimicrobiia Baikal-deep-G22               | 1,765,868                                         | 93               | 64,582            | 96.6                     | 2.1                     |                          |
| Alphaproteobacteria                          | Ca. Fonsibacter-Baikal1600m-PB-G20                | 946,322          | 4                 | 627,042                  | 75.5                    | 0.0                      |
|                                              | Ca. Fonsibacter Baikal-deep-G36                   | 997,510          | 66                | 66,508                   | 95.2                    | 3.7                      |
|                                              | Pseudolabrys-Baikal1600m-PB-G21                   | 2,738,833        | 15                | 461,811                  | 86.3                    | 0.8                      |
|                                              | Pseudolabrys Baikal-deep-G38                      | 2,494,857        | 119               | 94,749                   | 88.2                    | 1.3                      |
|                                              | Acetobacteraceae-Baikal1600m-PB-G19               | 3,427,791        | 9                 | 1,497,302                | 98.5                    | 2.0                      |
| Bacteroidetes                                | Acetobacteraceae Baikal-deep-G58                  | 1,946,587        | 55                | 177,716                  | 63.1                    | 0.0                      |
|                                              | Bacteroidetes-Baikal1600m-PB-G24                  | 1,675,431        | 10                | 367,283                  | 87.7                    | 0.0                      |
| Gammaproteobacteria                          | Bacteroidetes Baikal-deep-G73                     | 1,192,243        | 86                | 50,581                   | 76.2                    | 1.4                      |
|                                              | Methyloglobulus-Baikal1600m-PB-G30                | 2,053,671        | 12                | 506,236                  | 95.3                    | 1.3                      |
|                                              | Methyloglobulus Baikal-deep-G142                  | 1,106,434        | 124               | 32,022                   | 52.6                    | 0.0                      |
|                                              | Methylopumilus-Baikal1600m-PB-G31                 | 1,302,697        | 3                 | 641,110                  | 95.6                    | 0.0                      |
|                                              | Methylopumilus planktonicus Baikal-deep-G83       | 1,171,301        | 35                | 110,517                  | 94.2                    | 0.0                      |
|                                              | Burkholderiales-Baikal1600m-PB-G29                | 2,746,740        | 11                | 863,158                  | 96.8                    | 2.8                      |
| Patescibacteria                              | Betaproteobacteria Baikal-deep-G89                | 2,062,253        | 128               | 76,030                   | 82.5                    | 3.2                      |
|                                              | Ca. Levybacteria-Baikal1600m-PB-G34               | 907,563          | 1                 | 907,563                  | 97.7*                   | 0.0*                     |
|                                              | Levybacteria-Baikal-deep-G183                     | 677,466          | 13                | 174,588                  | 97.7*                   | 0.0*                     |
|                                              | Ca. Paceibacteria-Baikal1600m-PB-G35              | 1,059,132        | 6                 | 755,885                  | 93.0*                   | 0.0*                     |
|                                              | Parcubacteria-Baikal-deep-G184                    | 793,660          | 24                | 89,033                   | 90.7*                   | 0.0*                     |
|                                              | Ca. Gracilibacteria-Baikal1600m-PB-G33            | 919,098          | 17                | 231,563                  | 67.4*                   | 4.98*                    |
|                                              | Paceibacteria-bacterium-Baikal-deep-G197          | 321,018          | 41                | 14,845                   | 39.5*                   | 0.0*                     |
|                                              | Ca. Paceibacteria-Baikal1600m-PB-G36              | 582,052          | 1                 | 582,052                  | 97.7*                   | 0.0*                     |
|                                              | Paceibacteria-bacterium-Baikal-deep-G200          | 369,798          | 36                | 28,033                   | 69.7*                   | 0.0*                     |
|                                              | Ca. Saccharibacteria-Baikal1600m-PB-G46           | 724,546          | 1                 | 724,546                  | 100.0*                  | 0.0*                     |
|                                              | Patescibacteria-bacterium-Baikal-deep-G192        | 511,372          | 39                | 42,074                   | 93.0*                   | 0.0*                     |
|                                              | Patescibacteria-Baikal1600m-PB-G49                | 737,753          | 1                 | 737,753                  | 97.7*                   | 0.0*                     |
|                                              | Patescibacteria-bacterium-Baikal-deep-G193        | 578,258          | 29                | 53,386                   | 72.1*                   | 0.0*                     |
|                                              | Ca. Paceibacteria-Baikal1600m-PB-G38              | 803,329          | 1                 | 803,329                  | 97.7*                   | 0.0*                     |
|                                              | Kaiserbacteraceae-bacterium-Baikal-deep-G195      | 620,591          | 49                | 46,288                   | 62.8*                   | 4.65*                    |
|                                              | Ca. Staskawiczbacteria-Baikal1600m-PB-G48         | 522,042          | 2                 | 500,723                  | 90.7*                   | 0.0*                     |
|                                              | Staskawiczbacteriaceae-bacterium-Baikal-deep-G187 | 721,116          | 72                | 32,480                   | 72.1*                   | 11.6*                    |
|                                              | Ca. Paceibacteria-Baikal1600m-PB-G40              | 592,655          | 5                 | 171,467                  | 74.4*                   | 0.0*                     |
|                                              | Parcubacteria-Baikal-deep-G185                    | 527,091          | 29                | 63,755                   | 79.1*                   | 0.0*                     |
|                                              | Ca. Paceibacteria-Baikal1600m-PB-G42              | 558,371          | 2                 | 485,322                  | 86.1*                   | 0.0*                     |
| Paceibacteria-bacterium-Baikal-deep-G202     | 465,688                                           | 24               | 52,092            | 100*                     | 0.0*                    |                          |
| Ca. Paceibacteria-Baikal1600m-PB-G43         | 754,737                                           | 1                | 754,737           | 97.7*                    | 2.3*                    |                          |
| Taylorbacteraceae-bacterium-Baikal-deep-G189 | 685,593                                           | 28               | 65,363            | 65.1*                    | 2.3*                    |                          |
| Planctomycetes                               | Zavarzinella-Baikal1600m-PB-G53                   | 5,219,492        | 29                | 457,339                  | 75.3                    | 4.6                      |
|                                              | Gemmataceae Baikal-deep-G171                      | 5,712,728        | 169               | 175,789                  | 93.0                    | 4.7                      |
|                                              | Gemmataceae-Baikal1600m-PB-G50                    | 4,600,205        | 10                | 1,108,979                | 97.2                    | 1.1                      |
|                                              | Gemmataceae Baikal-deep-G161                      | 4,189,651        | 99                | 410,398                  | 97.0                    | 1.1                      |
|                                              | Gemmataceae-Baikal1600m-PB-G51                    | 4,632,407        | 21                | 804,744                  | 93.2                    | 1.1                      |
| Thaumarchaeota                               | Gemmataceae Baikal-deep-G173                      | 2,760,053        | 276               | 37,240                   | 86.4                    | 2.3                      |
|                                              | Nitrosarchaeum-Baikal1600m-PB-G54                 | 1,280,083        | 4                 | 793,988                  | 99.0                    | 2.4                      |
|                                              | Nitrosarchaeum Baikal-deep-G181                   | 957,170          | 79                | 44,673                   | 71.7                    | 1.0                      |
|                                              | Nitrosarchaeum-Baikal1600m-PB-G55                 | 1,245,765        | 2                 | 764,480                  | 99.0                    | 1.0                      |
| Nitrosarchaeum Baikal-deep-G180              | 716,049                                           | 83               | 55,419            | 68.0                     | 0.0                     |                          |

PacBio assembled genomes with a better recovery (as indicated by the CheckM completeness) are colored in green, otherwise they are red colored.

\*Completeness and contamination measured using a custom dataset for Ca. Patescibacteria

**Table S4.** Genomic parameters of the resulting bins from the Baikal 1600 m CCS sequences. The four Baikalibacteria bins are highlighted in yellow.

| Read Binning  | Total Size (Mb) | #Reads grouped | Total Deep Baikal 16S rRNA | 16S rRNA reads matching CPR (% total CPR) | Dereplicated Deep Baikal 16S rRNA (97%) | Size after scaffolding (Mb) | Largest Sequence Size and average (Kb) | GC content ( $\pm$ SD) |
|---------------|-----------------|----------------|----------------------------|-------------------------------------------|-----------------------------------------|-----------------------------|----------------------------------------|------------------------|
| RBin01        | 8.77            | 606            | 4                          | 1.23                                      | 3                                       | --                          | --                                     | 38.7 ( $\pm$ 2.4)      |
| RBin02        | 12.27           | 838            | 5                          | 1.54                                      | 4                                       | --                          | --                                     | 51.4 ( $\pm$ 2.2)      |
| RBin03        | 7.98            | 554            | 6                          | 1.85                                      | 2                                       | --                          | --                                     | 45.1 ( $\pm$ 5.2)      |
| <b>RBin04</b> | <b>22.35</b>    | <b>1528</b>    | <b>36</b>                  | <b>11.11</b>                              | <b>16</b>                               | <b>19.62</b>                | <b>173 / 16.4</b>                      | 48.3 ( $\pm$ 2.5)      |
| RBin05        | 11.75           | 814            | 6                          | 1.85                                      | 1                                       | --                          | --                                     | 35.4 ( $\pm$ 1.5)      |
| RBin06        | 20.98           | 1575           | 0                          | 0.00                                      | 0                                       | --                          | --                                     | 64.1 ( $\pm$ 3.1)      |
| RBin07        | 7.71            | 528            | 8                          | 2.47                                      | 3                                       | --                          | --                                     | 39.9 ( $\pm$ 1.4)      |
| <b>RBin08</b> | <b>11.15</b>    | <b>766</b>     | <b>19</b>                  | <b>5.86</b>                               | <b>9</b>                                | <b>10.73</b>                | <b>53 / 14.7</b>                       | 38.6 ( $\pm$ 1.4)      |
| <b>RBin09</b> | <b>5.38</b>     | <b>362</b>     | <b>22</b>                  | <b>6.79</b>                               | <b>4</b>                                | <b>4.72</b>                 | <b>360 / 16.5</b>                      | 43.9 ( $\pm$ 2.1)      |
| <b>RBin10</b> | <b>24.49</b>    | <b>1658</b>    | <b>17</b>                  | <b>5.25</b>                               | <b>10</b>                               | <b>21.31</b>                | <b>88 / 16.1</b>                       | 44.0 ( $\pm$ 2.0)      |
| RBin11        | 3.22            | 218            | 0                          | 0.00                                      | 0                                       | --                          | --                                     | 40.1 ( $\pm$ 1.4)      |
| RBin12        | 3.80            | 258            | 2                          | 0.62                                      | 2                                       | --                          | --                                     | 56.8 ( $\pm$ 1.9)      |
| RBin13        | 1.43            | 98             | 4                          | 1.23                                      | 1                                       | --                          | --                                     | 51.3 ( $\pm$ 1.6)      |
| RBin14        | 0.53            | 38             | 5                          | 1.54                                      | 1                                       | --                          | --                                     | 31.4 ( $\pm$ 1.0)      |
